# Supplementary material for: Is a 2D Nanostructured Surface Capable of Changing the Corrosion and Magnetic Properties of an Amorphous Alloy?
Source: MDPI journal article supplement (doi:10.3390/ijms241713373), 2023-08-29
Supplement: s1 [file s1]

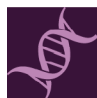

Supplementary Materials

# Is a 2D nanostructured surface capable of changing the corrosion and magnetic properties of an amorphous alloy?

Irina Kuznetsova <sup>1</sup>, Olga Lebedeva <sup>1,\*</sup>, Dmitry Kultin <sup>1</sup>, Natalia Perova <sup>2</sup>, Konstantin Kalmykov <sup>1</sup>, Petr Chernavskii <sup>1</sup>, Nikolai Perov <sup>2</sup>, and Leonid Kustov <sup>1,3,4,\*</sup>

Department of Chemistry, Lomonosov Moscow State University, Moscow, 119991, Russia; kuznetsowair@yandex.ru (I.K.), lebedeva@general.chem.msu.ru (O.K.), dkultin@general.chem.msu.ru (D.K.), lmk@ioc.ac.ru (L.K.), chern5@inbox.ru (P.C.), kbbkalmykov@mail.ru (K.K.)

<sup>2</sup> Faculty of Physics, Lomonosov Moscow State University, 119991 Moscow, Russia; perov@magn.ru (N.P.), perova.n@physics.msu.ru (Nt.P.)

<sup>3</sup> N.D. Zelinsky Institute of Organic Chemistry, Russian Academy of Sciences, Leninsky Prospekt 47, Moscow, 119991, Russia

<sup>4</sup> Institute of Ecology and Engineering, National Science and Technology University "MISiS", Leninsky Prospekt 4, Moscow, 119049, Russia

\* Correspondence: lmk@ioc.ac.ru, lebedeva@general.chem.msu.ru

## Preparation method of the amorphous Co<sub>75</sub>Si<sub>15</sub>Fe<sub>5</sub>Cr<sub>4.5</sub>Al<sub>0.5</sub> alloy

The rotating-cylinder method has been applied for the preparation of the amorphous iron-chromium-silicon alloy in the form of a ribbon. The starting materials were Co, Si, Fe, Cr and Al (purity 99.95–99.99%). The amorphous Co<sub>75</sub>Si<sub>15</sub>Fe<sub>5</sub>Cr<sub>4.5</sub>Al<sub>0.5</sub> alloy was prepared in an electric arc furnace in an argon atmosphere with the triple remelting procedure. Impinging a stream of molten alloy on the outer surface of a rotating cylinder in an argon atmosphere was used to convert the obtained crystalline sample to the amorphous state. The ribbon parameters were: width 7–10 mm, thickness 10 µm. The preparation conditions were determined by the necessity to obtain the material in the amorphous state. The amorphous alloy was obtained as a ribbon by high-speed quenching of the melt on a fast-moving substrate. The cooling rate was 106 K/s. The composition of the alloy was controlled by local micro-X-ray spectral analysis using an EVO-50 Zeiss scanning electron microscope EVO-50.

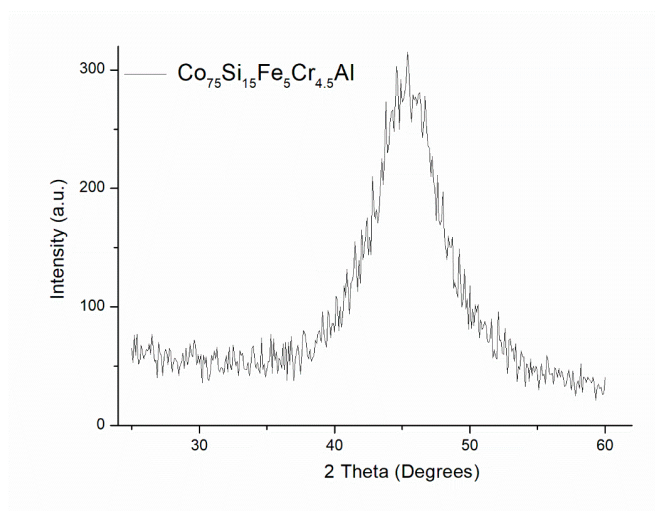

**Figure S1.** XRD pattern of the alloy sample 2 before annealing (700° C) (amorphous sample).

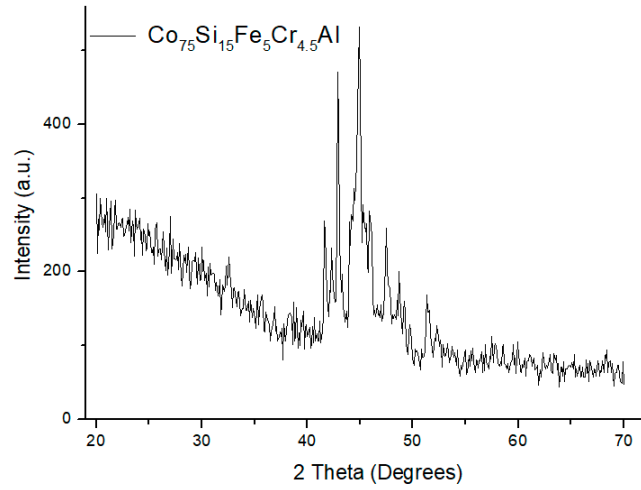

**Figure S2.** XRR pattern of the alloy sample 2 after annealing (700°C) (the sample underwent crystallization and stratified into two phases).

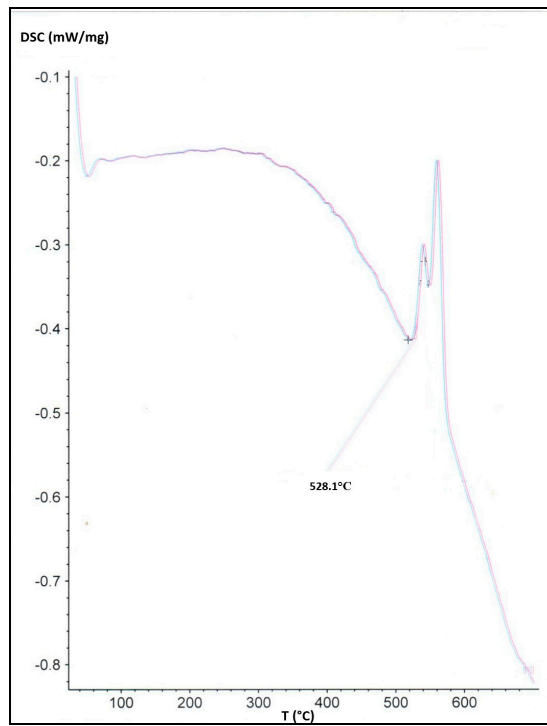

**Figure S3.** DSC curve for the alloy sample 2. The transition to the two-phase crystalline state is clearly visible.
